# Supplementary material for: Empowering Naringin’s Anti-Inflammatory Effects through Nanoencapsulation
Source: MDPI journal article supplement (doi:10.3390/ijms25084152), 2024-04-09
Supplement: s1 [file s1]

## Empowering Naringin's Anti-Inflammatory Effects through Nanoencapsulation

Andreia Marinho <sup>1,2</sup>, Catarina Leal Seabra <sup>1</sup>, Sofia A. C. Lima <sup>3</sup>, Alexandre Lobo-da-Cunha <sup>4</sup>,  
Salette Reis <sup>1</sup>, Cláudia Nunes <sup>1,3,\*</sup>

<sup>1</sup>LAQV, REQUIMTE, Faculdade de Farmácia, Universidade do Porto, R. Jorge de Viterbo Ferreira 228, 4050-313 Porto, Portugal

<sup>2</sup>LAQV, REQUIMTE, Faculdade de Ciências, Universidade do Porto, R. do Campo Alegre s/n, 4169-007 Porto, Portugal

<sup>3</sup>LAQV, REQUIMTE, Instituto de Ciências Biomédicas Abel Salazar, Universidade do Porto, R. Jorge de Viterbo Ferreira 228, 4050-313 Porto, Portugal

<sup>4</sup>Departamento de Microscopia, Instituto de Ciências Biomédicas Abel Salazar, Universidade do Porto, R. Jorge de Viterbo Ferreira 228, 4050-313 Porto, Portugal

\*Correspondence: cdnunes@ff.up.pt

### 1. In vitro release studies

Table S1 lists the results obtained for the release kinetics studies with an indication of the correlation coefficient values and the constants obtained for each model under study.

**Table S1:** Correlation coefficient ( $R^2$ ) for the release of NAR at different pH values, according to the models studied.

|                        | Regime | Zero-order |       | First-order |       | Hixson-Crowell |          | Higuchi |       | Korsmeyer-Peppas |          |
|------------------------|--------|------------|-------|-------------|-------|----------------|----------|---------|-------|------------------|----------|
|                        |        | $R^2$      | $k_0$ | $R^2$       | $k_1$ | $R^2$          | $k_{HC}$ | $R^2$   | $k_H$ | $R^2$            | $k_{KP}$ |
| NAR@NPs                | i      | 0.997      | 0.011 | 0.978       | 0.305 | 0.973          | -9.449   | 0.9852  | 0.053 | ↑1.000           | 1.279    |
|                        | ii     | 0.991      | 0.029 | ↑0.998      | 0.054 | 0.983          | -4.914   | 0.9801  | 0.015 | 0.944            | 0.261    |
|                        | iii    | 1.000      | 0.000 | 1.000       | 0.002 | 1.000          | -0.492   | 1.000   | 0.002 | 1.000            | 0.041    |
| NAR@NP <sub>STAB</sub> | i      | 0.996      | 0.012 | 0.981       | 0.316 | 0.995          | -10.555  | 0.981   | 0.032 | ↑1.000           | 1.320    |
|                        | ii     | 0.992      | 0.006 | ↑0.999      | 0.060 | 0.975          | -5.246   | 0.964   | 0.017 | 0.947            | 0.287    |
|                        | iii    | 1.000      | 0.000 | 1.000       | 0.002 | 1.000          | -0.419   | 1.000   | 0.002 | 1.000            | 0.040    |
| NAR@NP <sub>SHA</sub>  | i      | 0.997      | 0.011 | 0.980       | 0.313 | 0.992          | -11.064  | 0.983   | 0.028 | ↑1.000           | 1.309    |
|                        | ii     | 0.992      | 0.004 | ↑0.999      | 0.055 | 0.963          | -5.148   | 0.966   | 0.013 | 0.947            | 0.263    |
|                        | iii    | 1.000      | 0.000 | 1.000       | 0.002 | 1.000          | -0.421   | 1.000   | 0.001 | 1.000            | 0.037    |

↑ Represents models that best fit each release profile.

$k_0$ : zero-order constant;  $k_1$ : first-order constant;  $k_{HC}$ : release constant of Hixson-Crowell;  $k_H$ : release constant of Higuchi;  $k_{KP}$ : release constant of Korsmeyer-Peppas.

## 2. Cell uptake pathway inhibitors solutions

Table S2 lists the receptors used to study the internalization pathways of the development nanoparticles, as well as their respective functions.

**Table S2:** Selected inhibitors and respective functions applied to mechanistic studies of nanoparticles transport by THP-1 macrophages.

|                        | Inhibitor      | Concentration                       | Function                                         |
|------------------------|----------------|-------------------------------------|--------------------------------------------------|
| Endocytosis inhibitors | Chlorpromazine | 10 $\mu\text{g}\cdot\text{mL}^{-1}$ | Clathrin-mediated endocytosis                    |
|                        | Cytochalasin-D | 5 $\mu\text{g}\cdot\text{mL}^{-1}$  | Disrupt actin filaments and Macropinocytosis     |
|                        | Filipin        | 1 $\mu\text{g}\cdot\text{mL}^{-1}$  | Caveolae-mediated endocytosis                    |
| Energy-dependence      | Sodium azide   | 1 $\mu\text{g}\cdot\text{mL}^{-1}$  | Active transport inhibitor                       |
|                        | 4°C            | -                                   | Passive diffusion and active transport inhibitor |
